# Supplementary material
Source: Research Square preprint supplement (doi:10.21203/rs.3.rs-8955597/v1)
Supplement: Supplementary file 1 [file 087f7c507a0dfcb272ca436f.docx]

**Annex**

**Appendix1**: **A Questionnaire to be filled by residents of the surrounding and employees of Dashen Brewery S.C**

The purpose of this questionnaire is to collect data for a research work on the title of Assessment on practice and determinants of Corporate Social Responsibility in case of Dashen brewery S.C.

**General Instruction:**

Your participation is voluntary

The researcher keeps your confidentiality that your responses will not be disclosed to anyone except the purpose of the study

The research has no any negative impact for anyone participated in this study except merits for social and national development.

If you have any question, please give a missed call to this number +251918506722

Therefore, you are kindly requested to provide as accurate and recent information as possible.

Your cooperation on the interview would be highly appreciated

Thank you in advance for your kind cooperation!

**Name of interviewer-------------------------------------code of questionnaire-------------------**

**Encircle from the alternatives that identifies you**

**Socio demographic characteristics of the respondents**

| S.N | Variables | Category |
| --- | --- | --- |
| 1 | Age of respondents in years | 20-30 |
| 30-40 |
| 40-50 |
| >50 |
| 2 | Sex | Male |
| Female |
| 3 | Marital status | Unmarried |
| Married |
| Divorced |
| Widowed/widower |
| 4 | Religion | Orthodox |
| Protestant |
| Muslim |
| Catholic |
| 5 | Educational status | Can read and write |
| Elementary school literate |
| Secondary school literate |
| Preparatory school literate |
| College Diploma and vocational training |
| Degree |
| Masters and above |
| 6 | Type of stakeholder | Internal |
| External |
| 7 | Position of internal stakeholders | Employees |
| Position holders |
| 8 | Work Experience | <2 years |
| 2-5 years |
| 5-10 years |
| >10 years |
| 9 | Job of external | Trade |
| Government employee |
| Privately employed |
| Self employed |
| NGO employee |
| Unemployed or job seeker |

**Questions related to Environmental protection, and health related activities**

| S.N | Variables | Degree of Agreement |
| --- | --- | --- |
| 1 | Participates in environmental protection and safety campaigns or activities | SD |
| D |
| N |
| A |
| SA |
| 2 | Works on sound pollution | SD |
| D |
| N |
| A |
| SA |
| 3 | Involve in environmental ecosystem protection | SD |
| D |
| N |
| A |
| SA |
| 4 | Works on Air pollution control | SD |
| D |
| N |
| A |
| SA |
| 5 | Works on Water pollution control | SD |
| D |
| N |
| A |
| SA |
| 6 | City waste management practice of Dashen brewery S.C | SD |
| D |
| N |
| A |
| SA |

**Questions related to Community Health care related activities**

| S.N | Variables | DA |
| --- | --- | --- |
| 1 | Caring for people who live in HIV AIDS | SD |
| D |
| N |
| A |
| SA |
| 2 | It Helps elders and disabilities who have no care taker | SD |
| D |
| N |
| A |
| SA |
| 3 | Organize blood donation events for staffs | SD |
| D |
| N |
| A |
| SA |
| 4 | Caring for people living in HABESHA elders in Debre Berhan | SD |
| D |
| N |
| A |
| SA |
| 5 | Covers medical costs for those, who have special problems | SD |
| D |
| N |
| A |
| SA |
| 6 | Company’s encouragement to the practice of responsible drinking | SD |
| D |
| N |
| A |
| SA |

**Questions related to Company’s contribution in COVID 19 pandemics prevention**

| S.N | Variables | DA |
| --- | --- | --- |
| 1 | Cooperates in sponsoring health professional COVID 19 pandemics awareness creation initiatives | SD |
| D |
| N |
| A |
| SA |
| 2 | Involves in buying or sponsoring face masks and sanitizers for those who cannot afford | SD |
| D |
| N |
| A |
| SA |
| 3 | Delivers face masks and sanitizers for their employees | SD |
| D |
| N |
| A |
| SA |
| 4 | It helps economically disadvantaged groups in the time of COVID 19 pandemics | SD |
| D |
| N |
| A |
| SA |
| 5 | The company works in line with the standard precautions of COVID 19 prevention and control | SD |
| D |
| N |
| A |
| SA |
| 6 | Company’s cooperation in preventing COVID 19 Pandemics | SD |
| D |
| N |
| A |
| SA |

**Questions related to Employees’ safety and occupational health related**

| S.N | Variables | DA |
| --- | --- | --- |
| 1 | It provides health care coverage | SD |
| D |
| N |
| A |
| SA |
| 2 | It promotes safety first principle | SD |
| D |
| N |
| A |
| SA |
| 3 | They do have a safe and healthy working environment | SD |
| D |
| N |
| A |
| SA |

**Questions related to internal determinants of corporate social responsibility practice**

| S.N | Variables | Category | Outcomes | |
| --- | --- | --- | --- | --- |
| Practiced | Not practiced |
|  | Profitability | Yes |  |  |
| No |  |  |
|  | Firms age | Yes |  |  |
| No |  |  |
|  | Managers age | Yes |  |  |
| No |  |  |
|  | Employees activism | Yes |  |  |
| No |  |  |
|  | Firm’s location | Yes |  |  |
| No |  |  |
|  | leadership | Yes |  |  |
| No |  |  |
|  | Production activities | Yes |  |  |
| No |  |  |
|  | Social media marketing | Yes |  |  |
| No |  |  |
|  | Equity growth | Yes |  |  |
| No |  |  |

**Questions related to external determinants of corporate social responsibility practice**

| S.N | Variables | Category | Outcomes | |
| --- | --- | --- | --- | --- |
| CSR practiced | Not practiced |
|  | Government policy | Yes |  |  |
| No |  |  |
|  | Competition | Yes |  |  |
| No |  |  |
|  | Good industry -community cooperation | Yes |  |  |
| No |  |  |
|  | Community perception | Yes |  |  |
| No |  |  |
|  | Legal environment | Yes |  |  |
| No |  |  |
|  | Social license | Yes |  |  |
| No |  |  |

**SD= Strongly Disagree; D= Disagree; N=Neutral; A=Agree; SA=Strongly Agree: DA= Degree of agreement**

**Thank you once again for your kind cooperation**
